# Supplementary material for: Chlorogenic Acid and Quercetin in a Diet with Fermentable Fiber Influence Multiple Processes Involved in DSS-Induced Ulcerative Colitis but Do Not Reduce Injury
Source: MDPI journal article supplement (doi:10.3390/nu14183706), 2022-09-08
Supplement: s1 [file s1]

## *Supplementary Material*

**Supplemental Table S1. Composition of the basal and experimental diets provided to rats before and during DSS treatment to induce ulcerative colitis**

| Ingredient                      | Basal | Quercetin | Chlorogenic Acid |
|---------------------------------|-------|-----------|------------------|
|                                 |       | %         |                  |
| Dextrose <sup>1</sup>           | 51.06 | 50.61     | 51.01            |
| Casein <sup>1</sup>             | 22.35 | 22.35     | 22.35            |
| DL-methionine <sup>1</sup>      | 0.34  | 0.34      | 0.34             |
| Mineral mix <sup>1</sup>        | 3.91  | 3.91      | 3.91             |
| Vitamin mix <sup>1</sup>        | 1.12  | 1.12      | 1.12             |
| Choline bitartrate <sup>1</sup> | 0.22  | 0.22      | 0.22             |
| Pectin <sup>2</sup>             | 6.00  | 6.00      | 6.00             |
| Corn oil <sup>3</sup>           | 15.00 | 15.00     | 15.00            |
| Quercetin <sup>4</sup>          | -     | 0.45      | -                |
| Chlorogenic acid <sup>4</sup>   | -     | -         | 0.05             |

<sup>1</sup> Harlan, Madison, WI

<sup>2</sup> Gum Tech, Tuscon, AZ

<sup>3</sup> DYETS, Bethlehem, PA

<sup>4</sup> Sigma, St. Louis, MO

**Supplemental Table S2.** Fecal SCFA of control or DSS-treated rats consuming a basal diet or diets containing quercetin or chlorogenic acid<sup>1</sup>

| SCFA                                                   | <u>Basal Diet</u>            |                               | <u>Quercetin Diet</u>       |                              | <u>Chlorogenic Acid Diet</u> |                              |
|--------------------------------------------------------|------------------------------|-------------------------------|-----------------------------|------------------------------|------------------------------|------------------------------|
|                                                        | Control                      | DSS                           | Control                     | DSS                          | Control                      | DSS                          |
| <i>(<math>\mu\text{mol/g dry weight feces}</math>)</i> |                              |                               |                             |                              |                              |                              |
| <i>Post DSS-3</i>                                      |                              |                               |                             |                              |                              |                              |
| Acetic                                                 | 24.9 $\pm$ 5.1 <sup>a</sup>  | 73.4 $\pm$ 4.8 <sup>c</sup>   | 22.4 $\pm$ 5.1 <sup>a</sup> | 53.4 $\pm$ 4.6 <sup>b</sup>  | 23.3 $\pm$ 4.8 <sup>a</sup>  | 74.0 $\pm$ 4.8 <sup>c</sup>  |
| Butyric                                                | 7.9 $\pm$ 1.7 <sup>a</sup>   | 17.7 $\pm$ 1.6 <sup>b</sup>   | 8.9 $\pm$ 1.7 <sup>a</sup>  | 13.9 $\pm$ 1.5 <sup>b</sup>  | 8.3 $\pm$ 1.6 <sup>a</sup>   | 15.1 $\pm$ 1.6 <sup>b</sup>  |
| Total SCFA                                             | 47.1 $\pm$ 7.7 <sup>a</sup>  | 120.4 $\pm$ 7.3 <sup>c</sup>  | 44.5 $\pm$ 7.7 <sup>a</sup> | 90.8 $\pm$ 6.9 <sup>b</sup>  | 45.8 $\pm$ 7.3 <sup>a</sup>  | 118.1 $\pm$ 7.3 <sup>c</sup> |
| <i>Final recovery period</i>                           |                              |                               |                             |                              |                              |                              |
| Acetic                                                 | 23.2 $\pm$ 3.6 <sup>a</sup>  | 38.5 $\pm$ 3.2 <sup>b</sup>   | 24.7 $\pm$ 3.6 <sup>a</sup> | 45.5 $\pm$ 3.4 <sup>b</sup>  | 20.9 $\pm$ 3.8 <sup>a</sup>  | 45.4 $\pm$ 3.2 <sup>b</sup>  |
| Butyric                                                | 8.0 $\pm$ 0.9 <sup>a</sup>   | 10.8 $\pm$ 0.8 <sup>bc</sup>  | 9.6 $\pm$ 0.9 <sup>ab</sup> | 13.1 $\pm$ 0.8 <sup>c</sup>  | 8.0 $\pm$ 0.9 <sup>a</sup>   | 11.0 $\pm$ 0.8 <sup>bc</sup> |
| Total SCFA                                             | 44.7 $\pm$ 6.1 <sup>a</sup>  | 72.7 $\pm$ 5.5 <sup>b</sup>   | 48.3 $\pm$ 6.1 <sup>a</sup> | 82.6 $\pm$ 5.8 <sup>b</sup>  | 42.2 $\pm$ 6.5 <sup>a</sup>  | 82.7 $\pm$ 5.5 <sup>b</sup>  |
| %                                                      |                              |                               |                             |                              |                              |                              |
| <i>Post DSS-3</i>                                      |                              |                               |                             |                              |                              |                              |
| Acetic                                                 | 52.3 $\pm$ 1.5 <sup>a</sup>  | 60.7 $\pm$ 1.4 <sup>bc</sup>  | 50.5 $\pm$ 1.5 <sup>a</sup> | 57.6 $\pm$ 1.4 <sup>b</sup>  | 50.8 $\pm$ 1.4 <sup>a</sup>  | 62.6 $\pm$ 1.4 <sup>c</sup>  |
| Butyric                                                | 17.4 $\pm$ 1.0 <sup>bc</sup> | 14.3 $\pm$ 1.0 <sup>a</sup>   | 19.9 $\pm$ 1.0 <sup>c</sup> | 15.3 $\pm$ 1.0 <sup>ab</sup> | 18.2 $\pm$ 1.0 <sup>c</sup>  | 12.8 $\pm$ 1.0 <sup>a</sup>  |
| <i>Final recovery period</i>                           |                              |                               |                             |                              |                              |                              |
| Acetic                                                 | 51.5 $\pm$ 1.2 <sup>ab</sup> | 52.6 $\pm$ 1.1 <sup>abc</sup> | 50.5 $\pm$ 1.2 <sup>a</sup> | 55.1 $\pm$ 1.2 <sup>bc</sup> | 49.6 $\pm$ 1.3 <sup>a</sup>  | 54.7 $\pm$ 1.1 <sup>c</sup>  |
| Butyric                                                | 18.2 $\pm$ 0.8 <sup>a</sup>  | 14.9 $\pm$ 0.8 <sup>b</sup>   | 20.2 $\pm$ 0.8 <sup>a</sup> | 15.9 $\pm$ 0.8 <sup>b</sup>  | 18.9 $\pm$ 0.8 <sup>a</sup>  | 13.7 $\pm$ 0.8 <sup>b</sup>  |

<sup>1</sup> Values are LS means  $\pm$  SEM. Means without a common superscript differ ( $p < 0.05$ ). n=8-11 rats/group.
